# Supplementary material for: An Al-doped TiO2 interfacial layer for effective hole injection characteristics of quantum-dot light-emitting diodes
Source: Royal Society of Chemistry journal article supplement (doi:10.1039/d2tc00678b), 2022-01-01
Supplement: d2tc00678b1.pdf [file d2tc00678b1.pdf]

## Supporting Information

### Al-doped TiO<sub>2</sub> interfacial layer for effective hole injection characteristics of quantum-dot light-emitting diodes

Min Gye Kim,<sup>a,b</sup> Jae Seung Shin,<sup>a,b</sup> Jin Hyun Ma,<sup>a</sup> Jun Hyung Jeong,<sup>a</sup> Dong Hee Han<sup>a</sup>, Beom-Su Kim<sup>c</sup>, Woojin Jeon<sup>a</sup>, Yongsup Park<sup>c,d</sup> and Seong Jun Kang<sup>a,b,\*</sup>

<sup>a</sup> Department of Advanced Materials Engineering for Information and Electronics, Kyung Hee University, Yongin 17104, Republic of Korea

<sup>b</sup> Integrated Education Institute for Frontier Science & Technology (BK21 Four), Kyung Hee University, Yongin 17104, Republic of Korea

<sup>c</sup> Department of Physics and Research Institute for Basic Sciences, Kyung Hee University, Seoul 02447, Republic of Korea.

<sup>d</sup> Department of Information Display Kyung Hee University, Seoul 02447, Republic of Korea.

## Index

**Figure S1.** Tauc's plot of pure TiO<sub>2</sub>, ATO 60, ATO 120, and ATO 180.

**Figure S2.** EDS (a) mapping images and (b) spectra of QLED device with ATO 120.

**Figure S3.** Deconvolution of PL intensity spectra for (a) TiO<sub>2</sub>, (b) ATO 60, (c) ATO 120, and (d) ATO 180 at T<sub>dep</sub> of 200 °C.

**Figure S4.** AFM images of (a) ATO 60, (c) ATO 120 at T<sub>dep</sub> of 200 °C and (b) ATO 60, (d) ATO 120 at T<sub>dep</sub> of 250 °C on ALD process.

**Figure S5.** J-V characteristics of (a) QLEDs with ATO 180, ATO 120, ATO 60, and pure TiO<sub>2</sub> and (b) the analysis of ATO 120 using SCLC theory.

**Figure S6.** (a) J-V-L characteristics and (b) CE-V-EQE characteristics of QLEDs with ATOs, pure TiO<sub>2</sub>, and without any interfacial layer.

**Figure S7.** EDS mapping images of (a) reference device (ITO/V<sub>2</sub>O<sub>5</sub>/TFB/QDs/ZnO) and (b) QLEDs with an ATO layer (ITO/ATO 120/V<sub>2</sub>O<sub>5</sub>/TFB/QDs/ZnO).

**Figure S8.** (a) J-V-L characteristics, (b) CE-V-EQE characteristics, and (c) lifetimes of QLEDs with PEDOT:PSS HIL (ITO/PEDOT:PSS/TFB/QDs/ZnO) and ATO 120 (ITO/ATO 120/V<sub>2</sub>O<sub>5</sub>/TFB/QDs/ZnO).

**Figure S9.** TRPL of QDs on glass and QDs on different structure of hole injection layer.

**Table S1.** Applied voltages of QLEDs with different interfacial layer at the emission peak in the EL spectra.

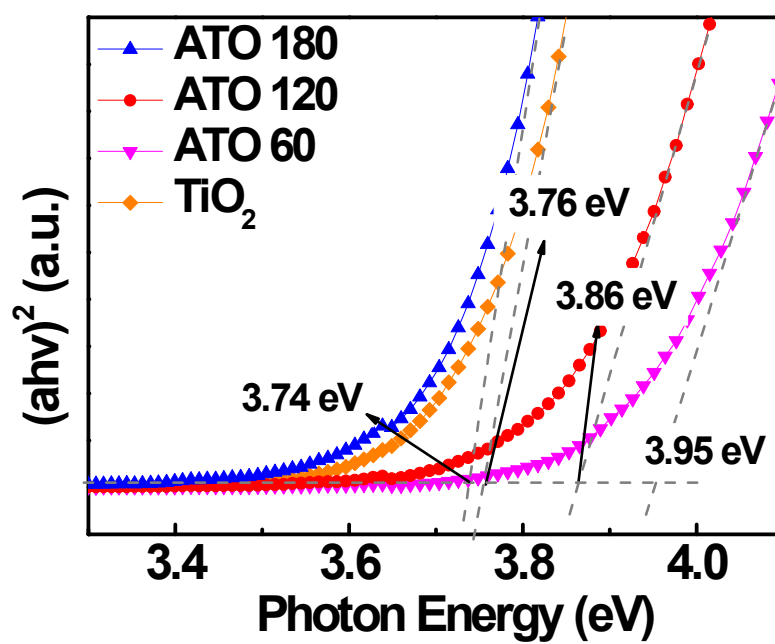

**Figure S1.** Tauc's plot of pure TiO<sub>2</sub>, ATO 60, ATO 120, and ATO 180.

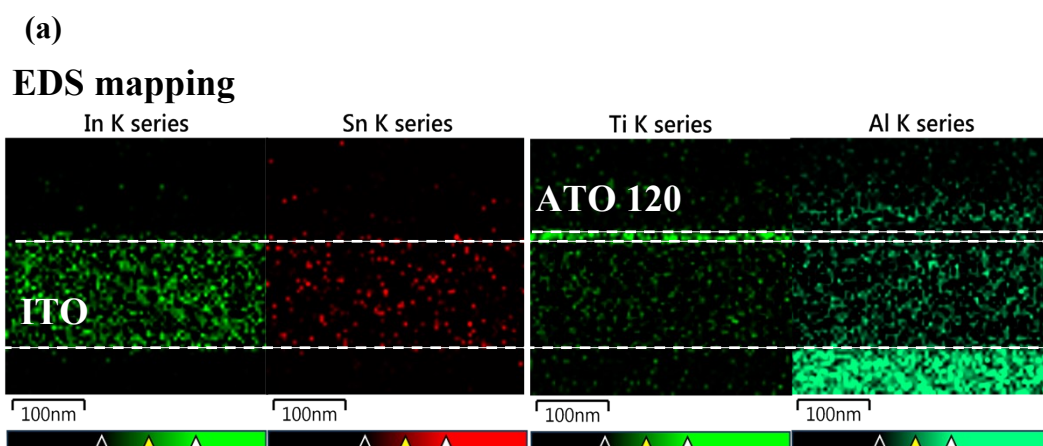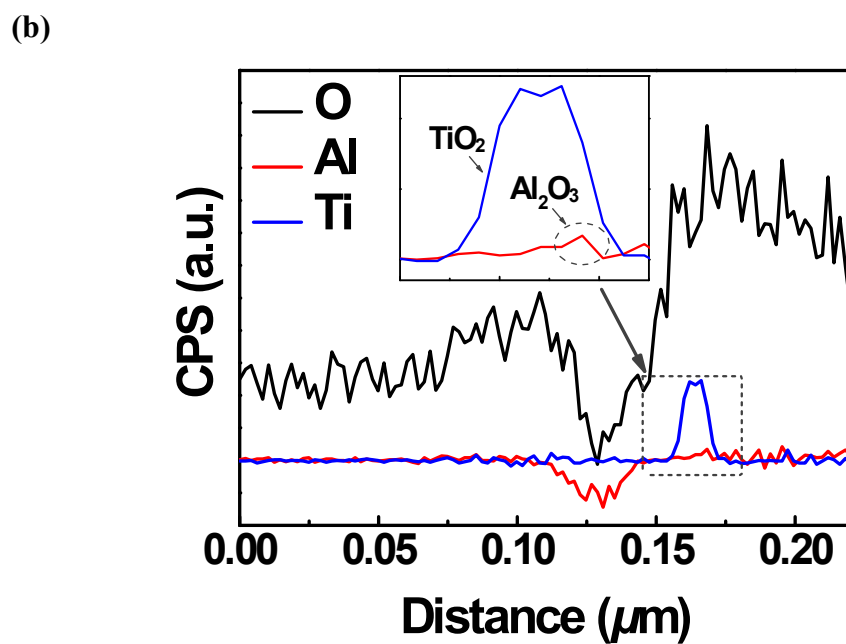

**Figure S2.** EDS (a) mapping images and (b) spectra of QLED device with ATO 120.

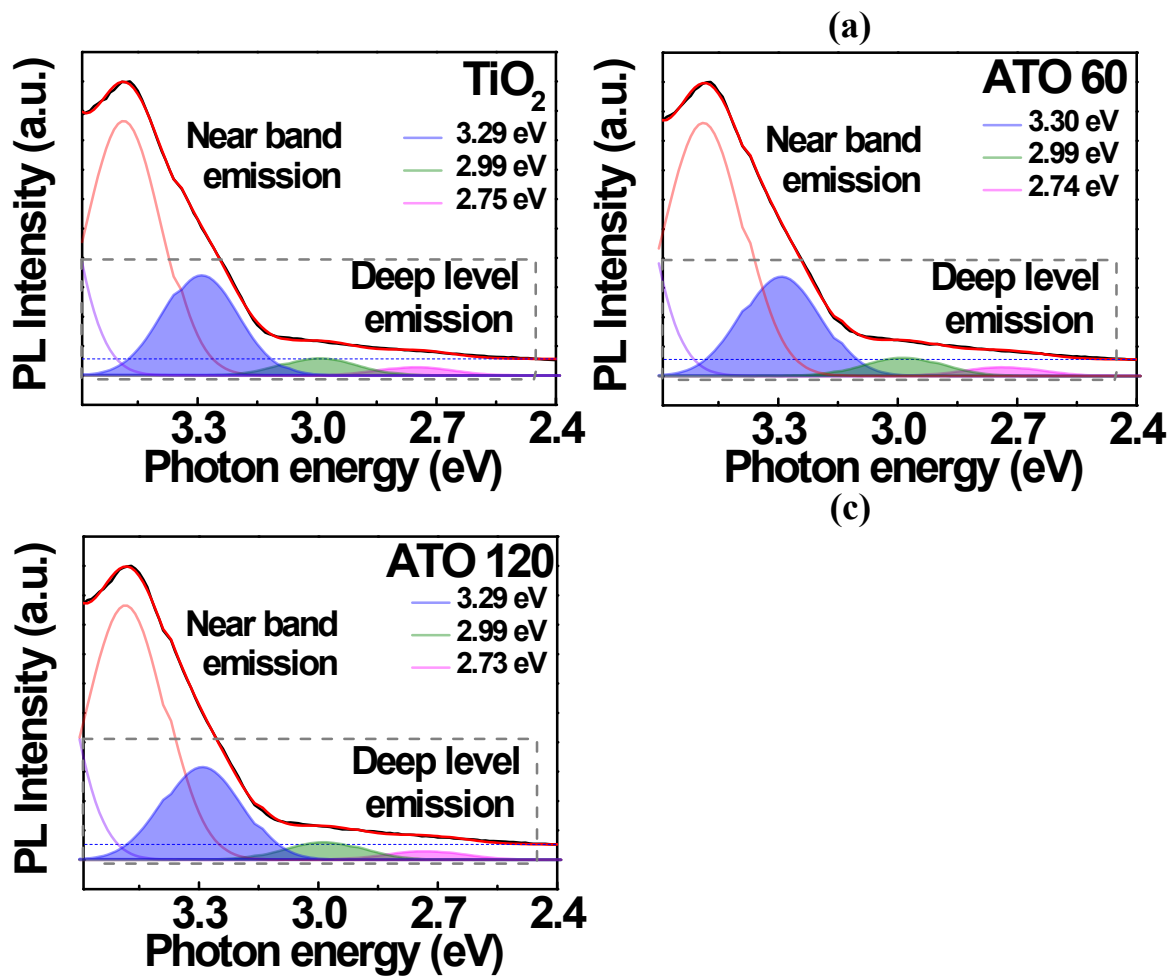

**Figure S3.** Deconvolution of PL intensity spectra for (a) TiO<sub>2</sub>, (b) ATO 60, (c) ATO 120, and (d) ATO 180 at  $T_{\text{dep}}$  of 200 °C.

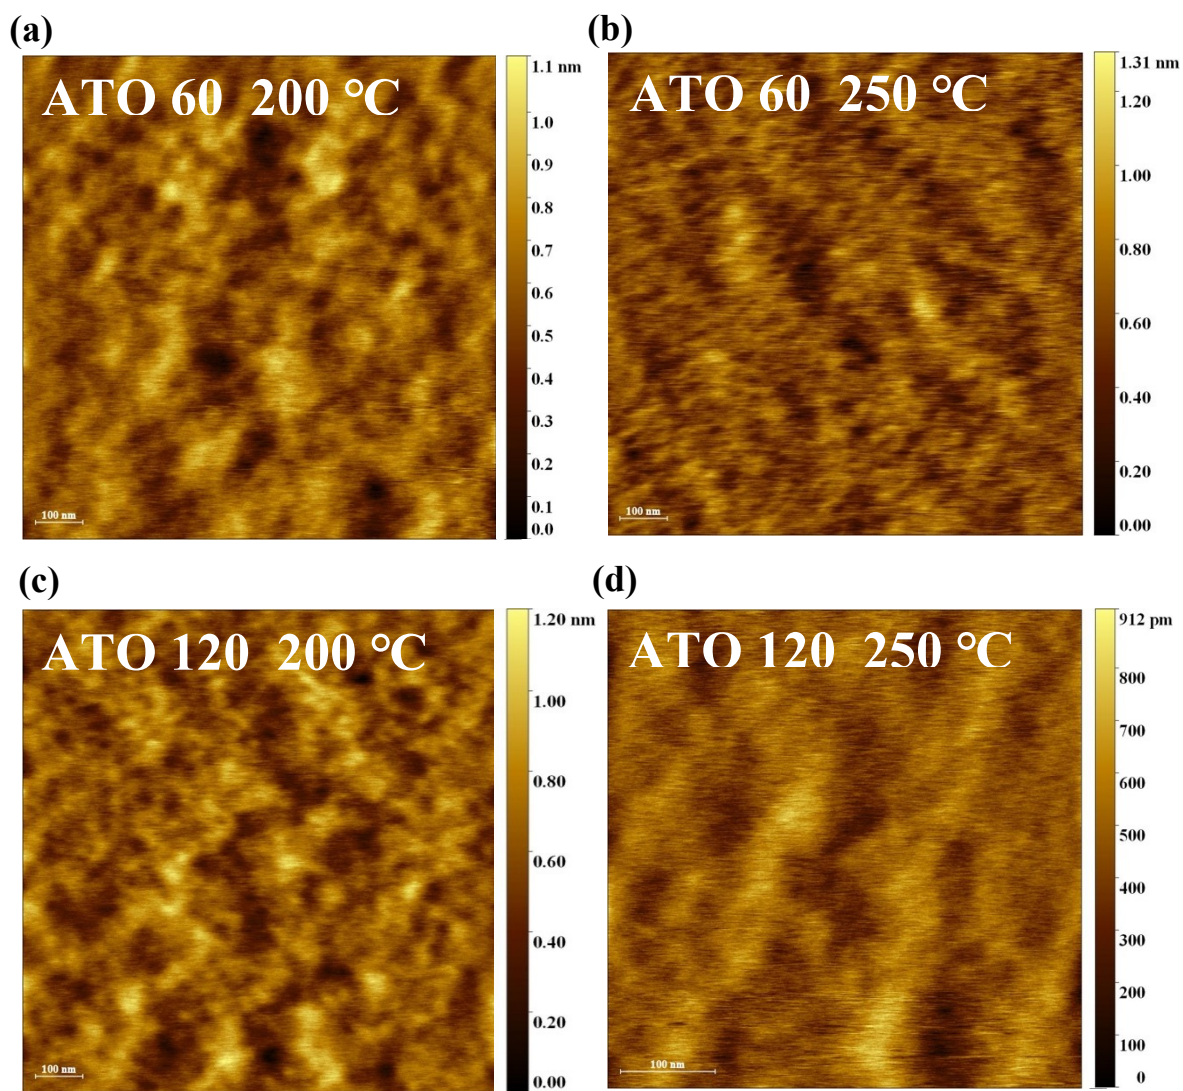

**Figure S4.** AFM images of (a) ATO 60, (c) ATO 120 at  $T_{\text{dep}}$  of 200 °C and (b) ATO 60, (d) ATO 120 at  $T_{\text{dep}}$  of 250 °C on ALD process.

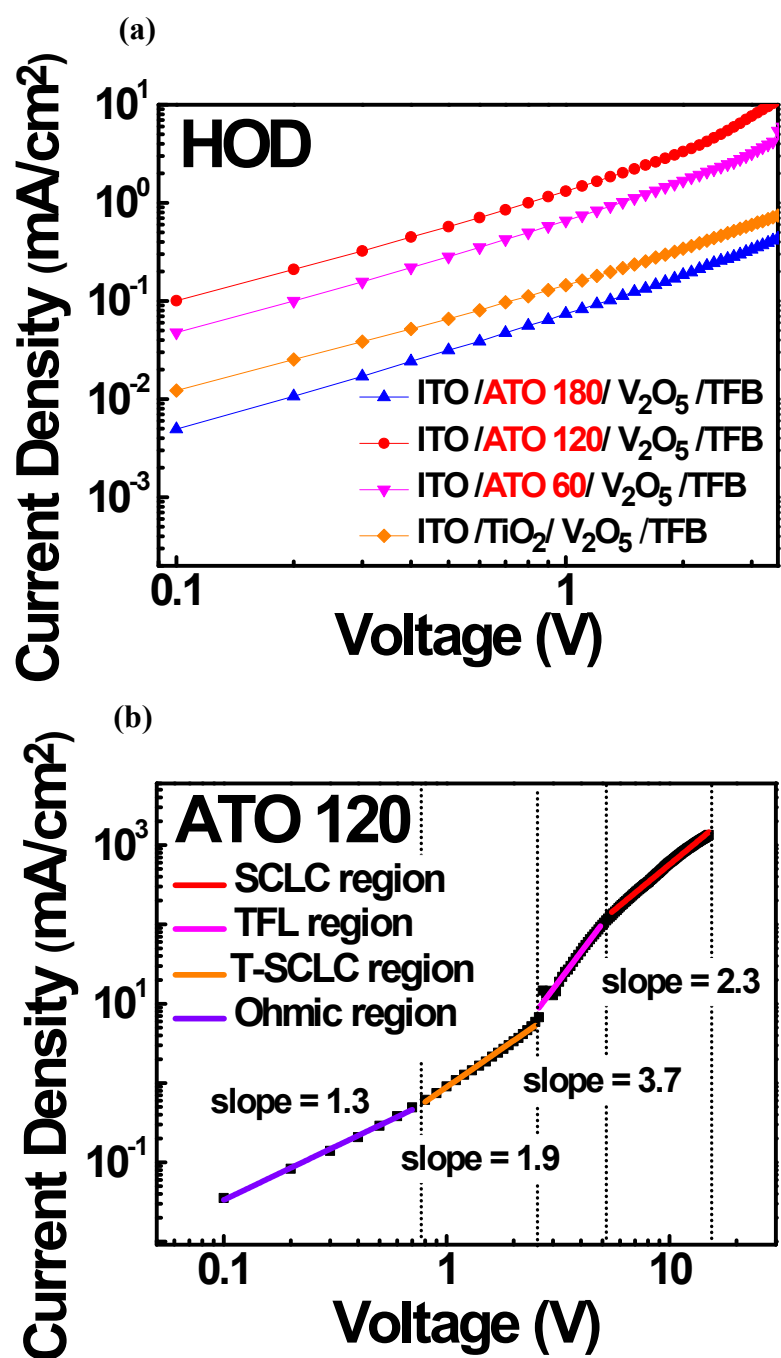

**Figure S5.** J-V characteristics of (a) QLEDs with ATO 180, ATO 120, ATO 60, and pure  $\text{TiO}_2$  and (b) the analysis of ATO 120 using SCLC theory.

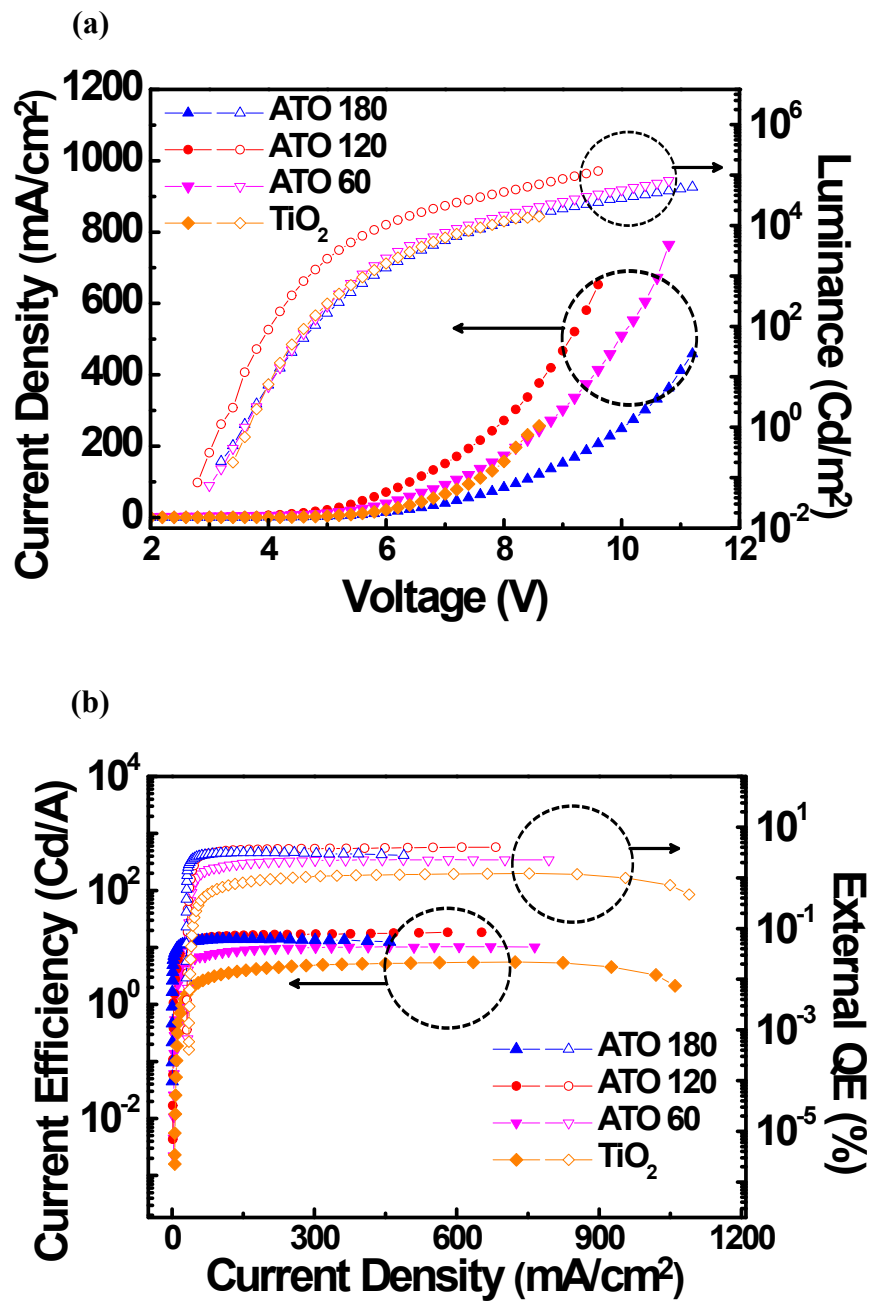

**Figure S6.** (a) J-V-L characteristics and (b) CE-V-EQE characteristics of QLEDs with ATOs, pure  $\text{TiO}_2$ , and without any interfacial layer.



(a) Ref. (control device)

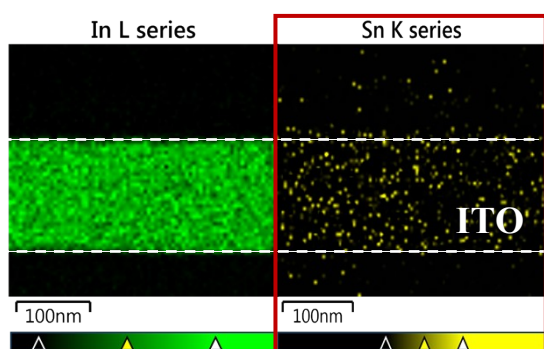

(b) QLEDs with an ATO 120 layer

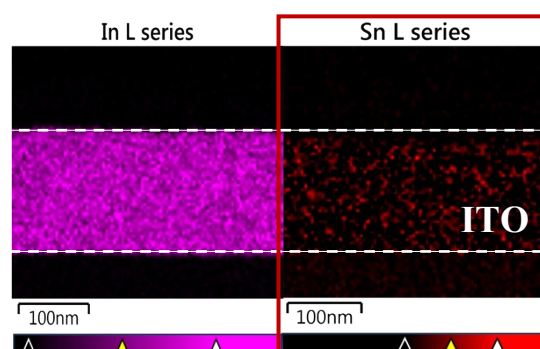

**Figure S7.** EDS mapping images of (a) reference device (ITO/V<sub>2</sub>O<sub>5</sub>/TFB/QDs/ZnO) and (b) QLEDs with an ATO layer (ITO/ATO 120/V<sub>2</sub>O<sub>5</sub>/TFB/QDs/ZnO).

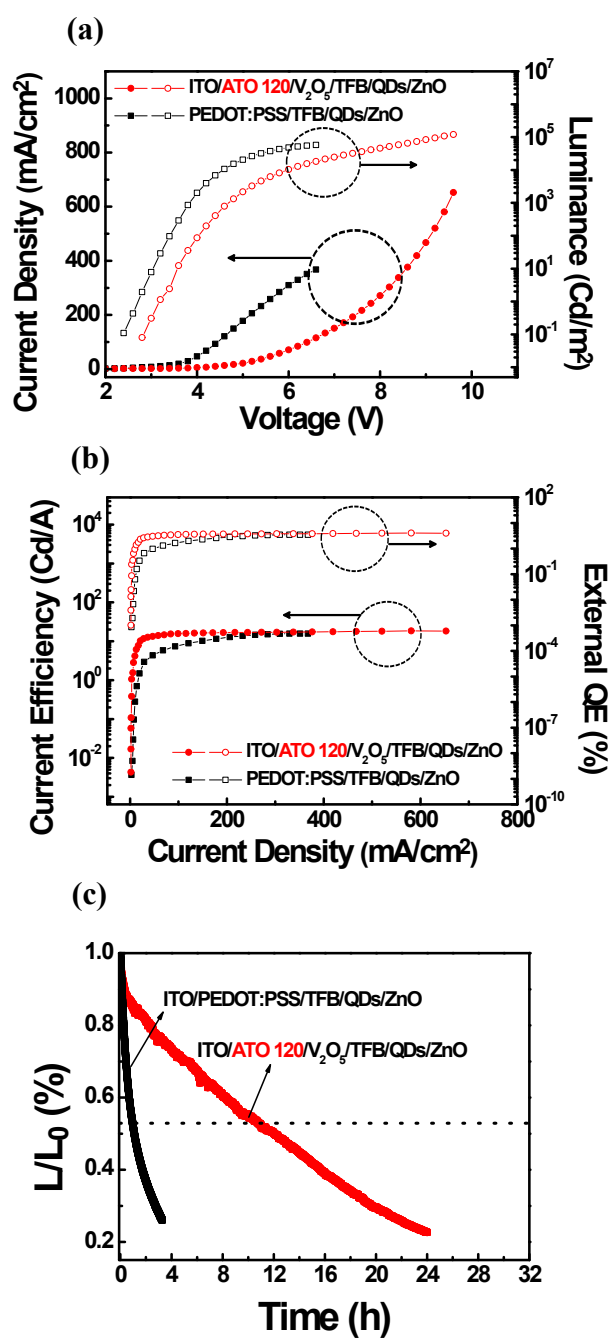

**Figure S8.** (a) J-V-L characteristics, (b) CE-V-EQE characteristics, and (c) lifetimes of QLEDs with PEDOT:PSS HIL (ITO/PEDOT:PSS/TFB/QDs/ZnO) and ATO 120 (ITO/ATO 120/V<sub>2</sub>O<sub>5</sub>/TFB/QDs/ZnO).

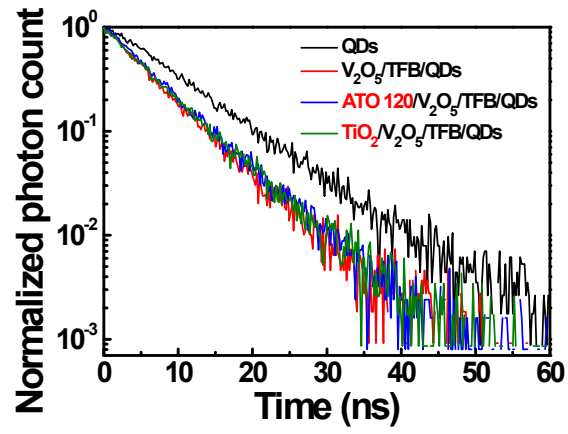

**Figure S9.** TRPL of QDs on glass and QDs on different structure of hole injection layer.

**Table S1.** Applied voltages of QLEDs with different interfacial layer at the emission peak in the EL spectra.

| <b>Samples</b> | <b>Applied voltages at EL peak (V)</b> |
|----------------|----------------------------------------|
| <i>ATO 180</i> | <i>11.8</i>                            |
| <i>ATO 120</i> | <i>9.6</i>                             |
| <i>ATO 60</i>  | <i>10.8</i>                            |
| <i>Ref.</i>    | <i>10.8</i>                            |
